# Supplementary material for: How stiff is DNA?
Source: Royal Society of Chemistry journal article supplement (doi:10.1039/b916183j), 2009-12-23
Supplement: b916183j.pdf [file b916183j.pdf]

SUPPLEMENTARY MATERIALS

**How stiff is DNA?**

Guohui Zheng,<sup>a</sup> Luke Czapla,<sup>a</sup> A. R. Srinivasan<sup>a</sup> and Wilma K. Olson<sup>a\*</sup>

Department of Chemistry & Chemical Biology, BioMaPS Institute for Quantitative  
Biology, Rutgers, the State University of New Jersey, Piscataway, NJ, 08854, USA.

\*E-mail: wilma.olson@rutgers.edu

## List of Figures

|           |                                                                                                                                                                                                                 |   |
|-----------|-----------------------------------------------------------------------------------------------------------------------------------------------------------------------------------------------------------------|---|
| <b>S1</b> | Chain-length dependence of the average and associated variance of the end-to-end distance of long, ideal, inextensible, twisted wormlike chains. ....                                                           | 3 |
| <b>S2</b> | Simulated probability density distributions of the distances $r_{Au}$ between gold nanocrystals attached via ‘ <b>stiff</b> ’, extended tethers to the ends of <b>mixed-sequence</b> DNA duplexes. ....         | 4 |
| <b>S3</b> | Simulated probability density distributions of the distances $r_{Au}$ between gold nanocrystals attached via ‘ <b>stiff</b> ’, extended tethers to the ends of <b>sequence-dependent</b> DNA duplexes. ....     | 5 |
| <b>S4</b> | Simulated probability density distributions of the distances $r_{Au}$ between gold nanocrystals attached via ‘ <b>flexible</b> ’, extended tethers to the ends of <b>ideal, inextensible</b> DNA duplexes. .... | 6 |

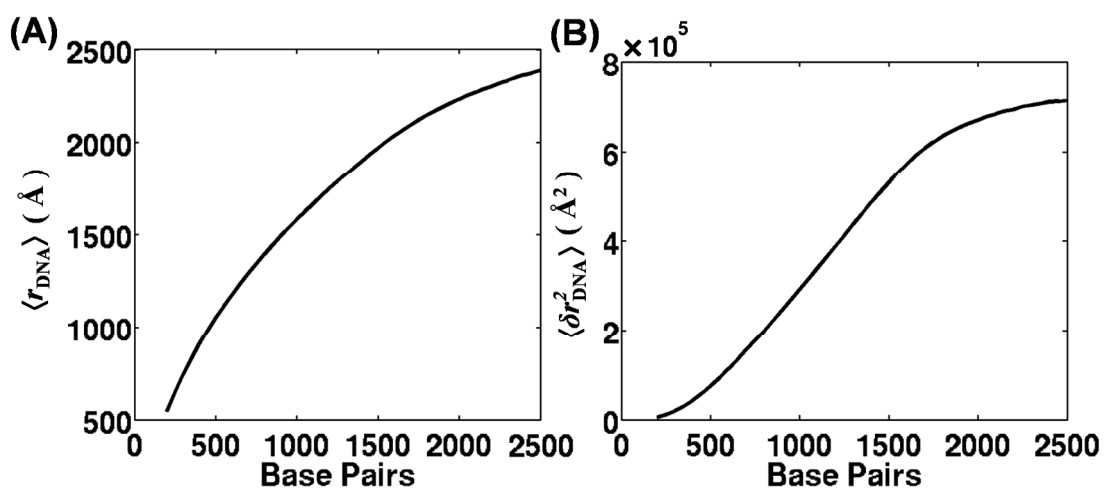

**Figure S1** – Chain-length dependence of (A) the average and (b) the associated variance of the end-to-end distance of long, ideal, inextensible, twisted wormlike chains (more than 200 bp). The DNA model is naturally straight with 10.5 bp/turn and elastic constants scaled to yield a persistence length of  $\sim 500 \text{\AA}$ .

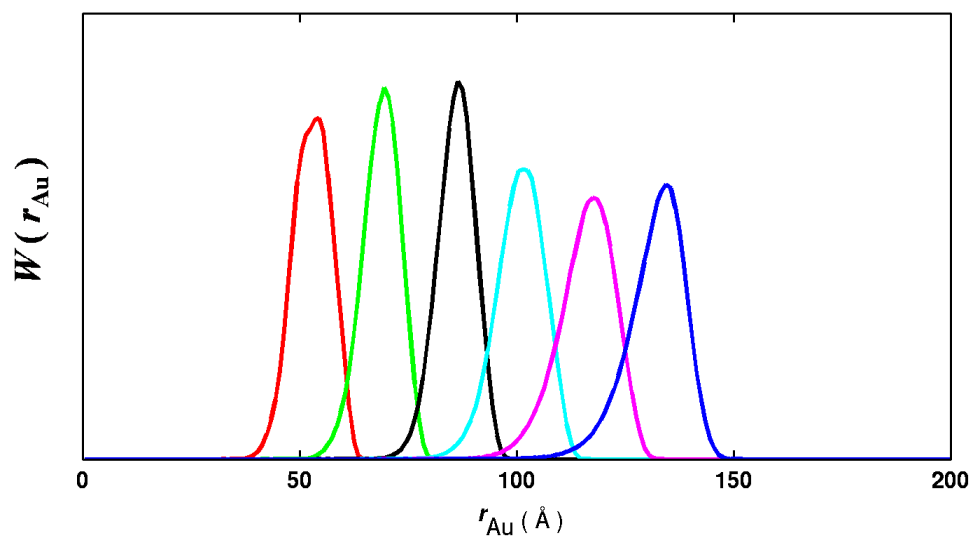

**Figure S2** – Simulated probability density distributions of the end-to-end distance  $r_{Au}$  between gold nanocrystals attached via ‘**stiff**’, extended tethers to the ends of **mixed-sequence** DNA duplexes of 10 bp (red), 15 bp (green), 20 bp (black), 25 bp (cyan), 30 bp (magenta), and 35 bp (blue). See Table 1 for the means and variances of these normalized profiles.

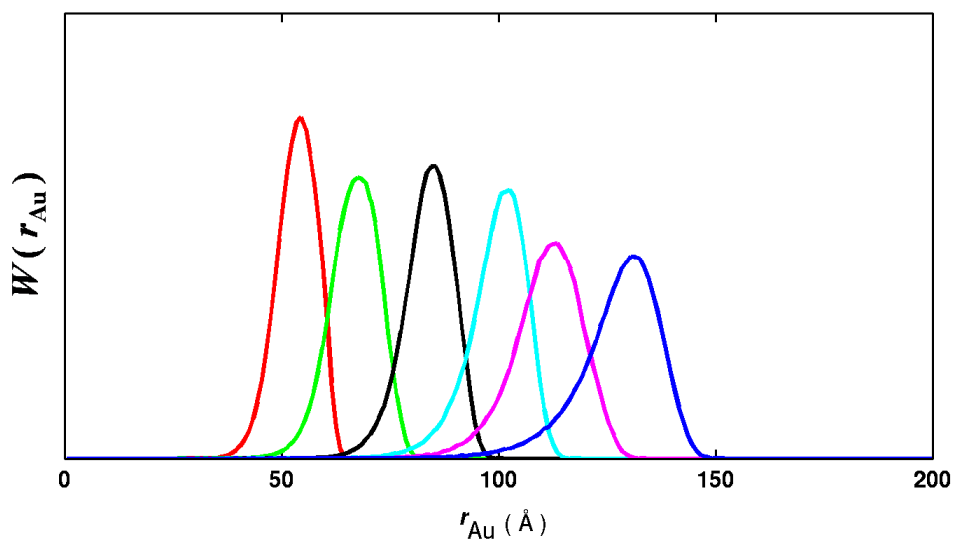

**Figure S3** – Simulated probability density distributions of the end-to-end distance  $r_{Au}$  between gold nanocrystals attached via ‘stiff’, extended tethers to the ends of **sequence-dependent** DNA duplexes of 10 bp (red), 15 bp (green), 20 bp (black), 25 bp (cyan), 30 bp (magenta), and 35 bp (blue). See Table 1 for the means and variances of these normalized profiles.

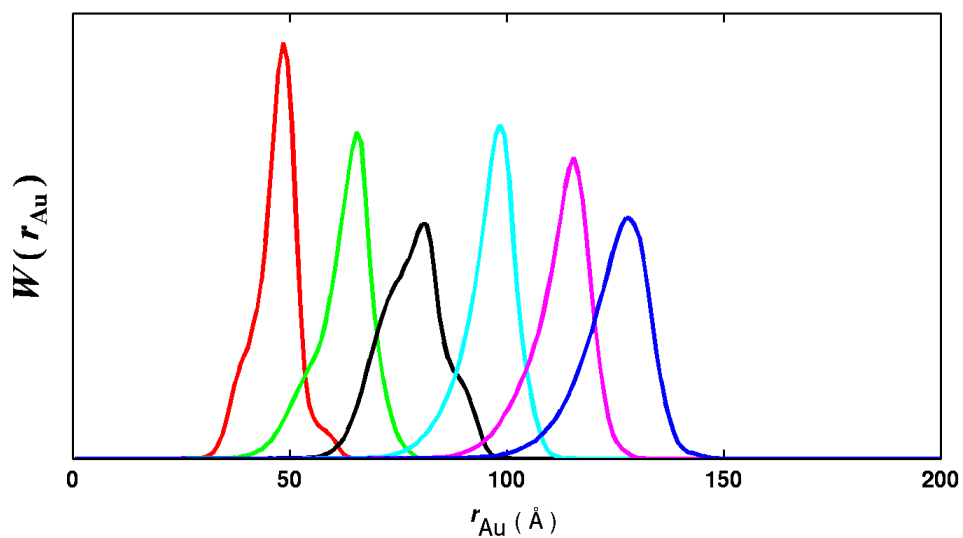

**Figure S4** – Simulated probability density distributions of the end-to-end distance  $r_{Au}$  between gold nanocrystals attached via ‘flexible’, extended tethers to the ends of **ideal, inextensible** DNA duplexes of 10 bp (red), 15 bp (green), 20 bp (black), 25 bp (cyan), 30 bp (magenta), and 35 bp (blue). See Table 1 for the means and variances of these normalized profiles.
